# Supplementary material for: Salt intrusion dynamics in a well-mixed sub-estuary connected to a partially to well-mixed main estuary
Source: Copernicus journal article supplement (doi:10.5194/os-20-181-2024), 2024-02-19
Supplement: Supplementary file 1 [file os-20-181-2024-supplement.pdf]

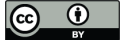

*Supplement of*

## **Salt intrusion dynamics in a well-mixed sub-estuary connected to a partially to well-mixed main estuary**

**Zhongyuan Lin et al.**

*Correspondence to:* Wenping Gong ([gongwp@mail.sysu.edu.cn](mailto:gongwp@mail.sysu.edu.cn))

The copyright of individual parts of the supplement might differ from the article licence.

We present the longitudinal profiles of subtidal current and salinity along the channels in the main estuary and the sub-estuary during typical spring and neap tides. Fig. S1 is for the dry condition with  $1500 \text{ m}^3/\text{s}$  at the head of the main estuary, and Fig. S2 for the extremely dry condition with  $500 \text{ m}^3/\text{s}$  released at the head of the main estuary.

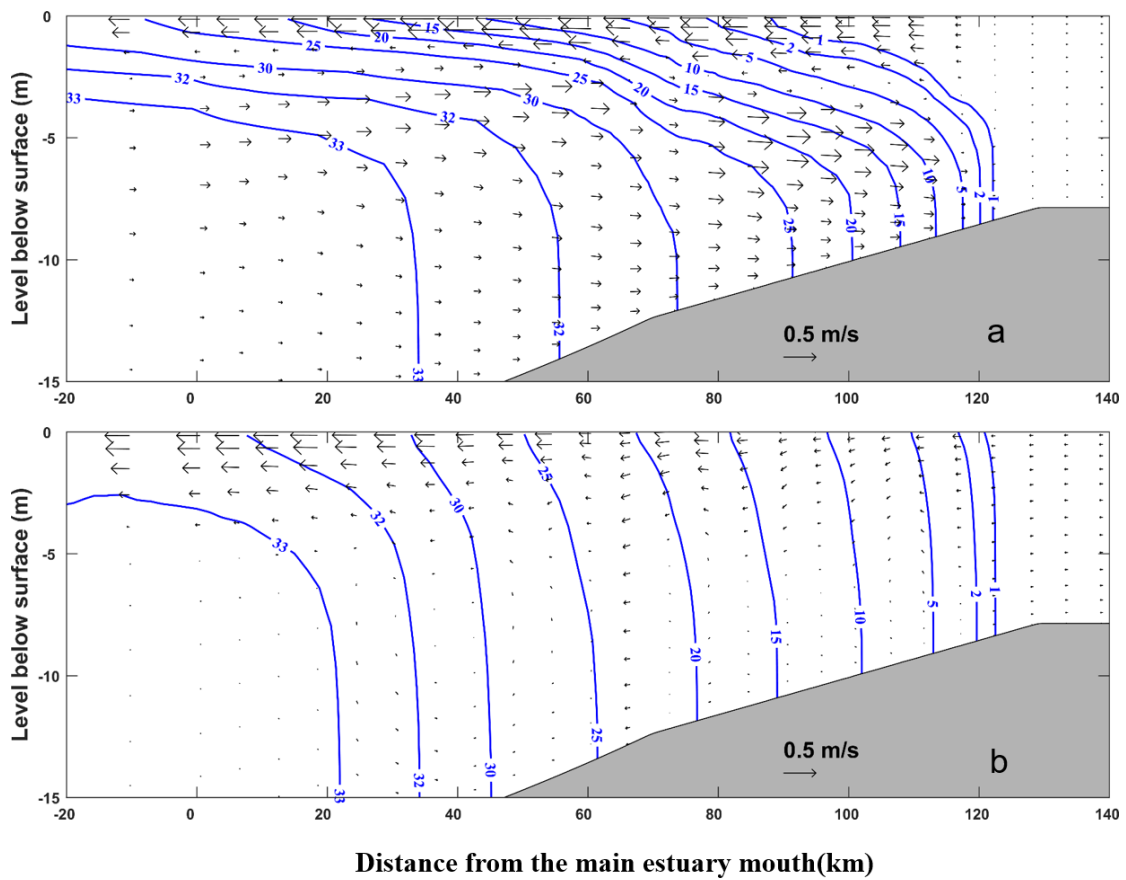

Fig. S1. The longitudinal profile of salinity and mean current in the main estuary under the river discharge of  $1500 \text{ m}^3/\text{s}$ : a) during a neap tide; b) during a spring tide.

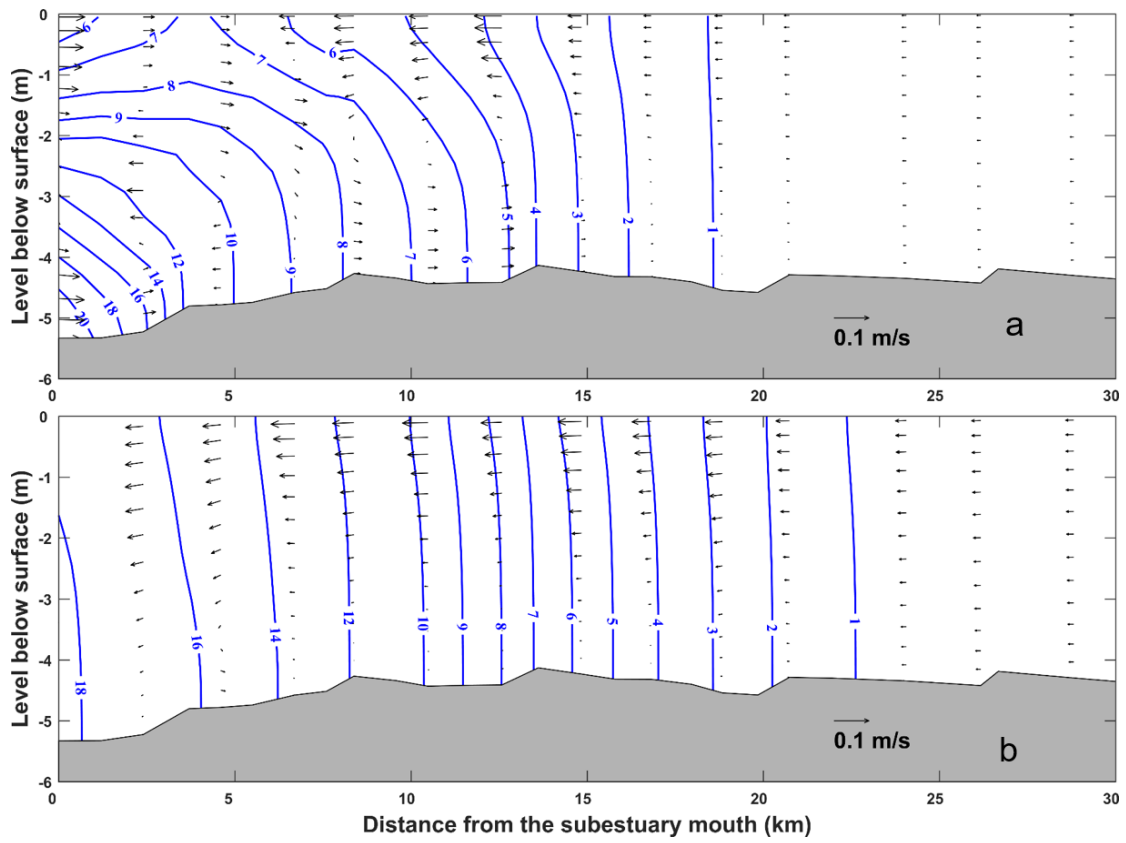

Fig. S2. The longitudinal profile of salinity and mean current in the main estuary under the river discharge of  $500 \text{ m}^3/\text{s}$ : a) during a neap tide; b) during a spring tide.
